# Supplementary material for: The Position and Complex Genomic Architecture of Plant T-DNA Insertions Revealed by 4SEE
Source: Int J Mol Sci. 2020 Mar 30;21(7):2373. doi: 10.3390/ijms21072373 (PMC7177604; doi:10.3390/ijms21072373)
Supplement: Supplementary file 1 [file ijms-21-02373-s001.zip › Krispil sup_tables.xlsx]

## Sheet: sup_table_1_endogenous
Supplementary Table 1.
4SEE analysis of MBP1, CytC ans SBT4. Shown: The amount of templte used for 4C , the number of mapped reads containing the viewpoint primer, DPC at three cutoffs trlatively to the peak height.
Viewpoint		template (ng)	Experiment	Aligned reads	0.9	0.8	0.5
MBP1	At1G52040	1200	replicate 1	2145251	5174.5	4520	7121.5
MBP1	At1G52040	1200	replicate 2	2016755	4391	4520	2545
pif4	At2G43010	1200	replicate 1	4957645	4841.5	1338.5	1635.5
pif4	At2G43010	1200	replicate 2	2129612	1805.5	814.5	554
SBT4.12	At5G59090	1200	replicate 1	1448011	5984	5117	8528.5
SBT4.12	At5G59090	1200	replicate 2	1806466	2267	4066.5	3528.5

## Sheet: sup_table_2_ADF
Supplementary Table 2. 4SEE of the endogenous ADF8 gene.
The amount of template (ng) used for 4C, the number of mapped reads containing the viewpoint primer and DPC at three cutoffs are presented.
template (ng)	Aligned reads	0.9	0.8	0.5
30ng	10000000	539	395	170.5
30ng	5000000	9438.5	3333	2045.5
30ng	2500000	8901.5	4020.5	1957
30ng	1000000	1386	3476	2045.5
30ng	500000	3111.5	2011	1759
30ng	250000	3634	691	915.5
30ng	100000	1212	572	1004
30ng	50000	1412	1081	170.5
60ng	10000000	7333.5	6290	2399
60ng	5000000	7333.5	8379.5	1759
60ng	2500000	5463.5	8379.5	1152
60ng	1000000	7333.5	6290	1357.5
60ng	500000	8139	6290	1405.5
60ng	250000	6290	3657.5	915.5
60ng	100000	1212	572	915.5
90ng	10000000	10235.5	5589	1759
90ng	5000000	10741.5	7678.5	1405.5
90ng	2500000	5463.5	2562	170.5
90ng	1000000	7419	4826	1405.5
90ng	500000	5792	5707.5	1405.5
90ng	250000	3634	691	915.5
90ng	100000	1212	1212	915.5
90ng	50000	1212	572	915.5
120ng	10000000	2540.5	552	760.5
120ng	5000000	3107.5	1205.5	170.5
120ng	2500000	990	32.5	170.5
120ng	1000000	3757	371.5	572
120ng	500000	385	1205.5	1317
120ng	250000	5088.5	669	572
120ng	100000	1212	170.5	170.5
120ng	50000	1212	318.5	166.5
150ng	10000000	4826	6766.5	2407
150ng	5000000	647.5	2005	170.5
150ng	2500000	5463.5	4826	1317
150ng	1000000	7419	5707.5	2399
150ng	500000	6932.5	2712	1405.5
150ng	250000	1214.5	866.5	572
150ng	100000	1212	1212	1357.5
150ng	50000	845	1485	170.5
180ng	10000000	9257.5	4286.5	2407
180ng	5000000	9968.5	4869	1004
180ng	2500000	4518.5	783	170.5
180ng	1000000	2913.5	2011	1317
180ng	500000	6932.5	2406	572
180ng	250000	1137	3107	572
180ng	100000	4518.5	783	170.5
180ng	50000	1212	572	915.5
210ng	10000000	11511	12114	2399
210ng	5000000	4518.5	2476.5	170.5
210ng	2500000	7333.5	8379.5	1759
210ng	1000000	10474.5	5006.5	2045.5
210ng	500000	6766.5	2011	915.5
210ng	250000	2046	1205.5	170.5
210ng	100000	1212	170.5	170.5
210ng	50000	1212	572	915.5
240ng	10000000	6766.5	3595.5	2279
240ng	5000000	1085	45	170.5
240ng	2500000	7333.5	8379.5	1759
240ng	1000000	4020.5	2406	1317
240ng	500000	7333.5	3107	1957
240ng	250000	806.5	2373	572
240ng	100000	1212	1212	915.5
240ng	50000	1212	572	170.5
270ng	10000000	7333.5	3688.5	2279
270ng	5000000	4518.5	3247.5	170.5
270ng	2500000	3949.5	4159.5	1405.5
270ng	1000000	1386	3476	2045.5
270ng	500000	4216.5	2011	1317
270ng	250000	1033.5	1672	170.5
270ng	100000	1212	1212	915.5
270ng	50000	1212	572	170.5

## Sheet: sup_table_3_salk_lines
Supplementary Table 3. 4SEE of SALK lines.
Shown: The amount of templte used for 4C (ng) , the number of mapped reads containing the viewpoint primer, % of those reads mapped to the Arabidopsis thaliana genome, DPC at three cutoffs trlatively to the peak height.										SALK lines used in this study and the position ot the T-DNA integration site according to TAIR database.
line	ng	reads	mapped reads	%mapped	0.9	0.8	0.5			ABRC Stock	SALK	Resistance	chr	integration position
SALK_063720	120ng	233148	88491	0.379549	1540.5	3318	722			CS16269	SALK_063720	kan	Chr2	19260594
SALK_063720	180ng	418327	163890	0.391775	363.5	971.5	930.5			CS16346	SALK_011436	kan	Chr5	25140776
SALK_063720	210ng	496394	197545	0.39796	629	460.5	1108.5			CS16350	SALK_009469	kan	Chr2	19227265
SALK_063720	30ng	78067	33655	0.431104	1495.5	747.5	522.5			CS16385	SALK_041474	kan	Chr5	4504693
SALK_063720	60ng	139522	51986	0.372601	1795.5	1739.5	3297.5			CS16389	SALK_064627	kan	Chr3	772029
SALK_063720	60ng	93626	36505	0.389902	4219.5	5514	930.5			CS16390	SALK_005512	kan	Chr3	15763684
SALK_063720	60ng	185179	75399	0.407168	3815	3085	1383.5
SALK_063720	90ng	217589	85641	0.393591	684.5	1739.5	2872
SALK_009469	30ng	492508	144475	0.293345	7850	2422.5	2963
SALK_011436	30ng	922835	222103	0.240675	NA-Rearrangement in the integration locus
SALK_011436	60ng	675538	164934	0.244152	NA-Rearrangement in the integration locus
SALK_011436	60ng	1279023	310060	0.242419	NA-Rearrangement in the integration locus
SALK_011436	90ng	1598373	387037	0.242144	NA-Rearrangement in the integration locus
SALK_041474	30ng	75136	34291	0.456386	1400	869	449
SALK_064627	120ng	101823	26366	0.25894	2462	4194.5	273
SALK_064627	150ng	172810	45348	0.262415	2462	2367	544.5
SALK_064627	180ng	170412	42297	0.248204	5779	4933	3444
SALK_064627	30ng	70987	18982	0.267401	3951.5	2191.5	5897
SALK_064627	60ng	46623	11496	0.246574	6459.5	2462	678
SALK_064627	60ng	55200	14870	0.269384	10590	16068	10039.5
SALK_064627	60ng	68589	15931	0.232268	18450	7072	812.5
SALK_064627	90ng	117610	30478	0.259145	3271.5	634.5	273
SALK_005512	30ng	124858	31382	0.251342	660.5	4820	4899
SALK_005512	60ng	175999	56801	0.322735	11969	4904	5055.5
SALK_005512	60ng	94550	29087	0.307636	11786.5	10806.5	8404
SALK_005512	60ng	76736	21650	0.282136	11786.5	6817.5	6997
SALK_005512	90ng	300857	88183	0.293106	4328.5	3551.5	1155.5
SALK_005512	120ng	270549	85888	0.317458	2480	5208.5	17942.5
SALK_005512	150ng	395407	117270	0.29658	754	5208.5	179.5
SALK_005512	210ng	472143	138920	0.294233	9346.5	5826	179.5
SALK_005512	180ng	347285	107538	0.309653	6501.5	5208.5	6049.5

## Sheet: sup_table_4_primers
Supplementary Table 4. Primer sequences used for 4C
The sequence of the primer at the Csp6I end of the fragments was used for alignment
gene/locus	primer CSP6I side	primer DPNII side
ADF8	TTTTATGCGGCCCAAACGAC	GAAAACTTCAACGGTCCAATGAT
BirA	TCGCTCATGTGTTGAGCATATAAGA	GCATGGCCGCCAACGTATTAC
COX11	CTAACGGTGGAGCTGCAAAGTAC	TAATTTCACATGTGAATCAGTGGATC
C2H2C	ACAAGATGGTTAGAAAAATAGACT	ATTTAAGCTTAAATACGAAGATGATC
SBT4.12	GCATAAAATCGTTTTAAATTGGTAC	GACAACTCTGAACACGGTGCATGTATG
BON2	GAAGAAACTGAACACATCGTAC	TTCTCTTGGATAAGGAACCGATC
EMB76	ACAAGTATCGGTGGGGTATGTAC	CCCCCTTCATCACTACAGATC
AT5G06800-myb-like	ACCTTCTCTGGTCTAACTCCGT	GCATGGGAGGAATAGCGATC
PP2Cf	TCCCTTCAAGTCAAAATCATG	TTCTCTTCAGCTTTCATTTAGATC
MBP1	TATGACATCTGTGGAGGGTAC	GTCTTTACATATGCACCAAGAGATC
pif4	CCTTCAACTGCATTCCAAAGTGTAC	AAAGTTTGAAAGCAGAACATTCGGATC
RT5	GGGTTTTGTTTCTCATGGGCTT	TAAACTCATCACCTCGCAGATC
SALK lines	CACCGCTTCTCAACCCGGTAC	GGAACAGTGAATTGGAGTTCGTCTTG
